# Supplementary material for: The Effects of Adherence to Non-Steroidal Anti-Inflammatory Drugs and Factors Influencing Drug Adherence in Patients with Knee Osteoarthritis
Source: PubMed Central journal article supplement — J Korean Med Sci. 2016 Mar 29;31(5):795–800. doi: 10.3346/jkms.2016.31.5.795 (PMC4835608; doi:10.3346/jkms.2016.31.5.795), 2016-03-29

< Appendix 2 >

## FIRST ASSESSMENT – PATIENT

Visit Date: | d | d | / | m | m | / | y | y | y | y |

### 1. General and clinical characteristics

|                         |                                                                                                                                             |                      |                        |
|-------------------------|---------------------------------------------------------------------------------------------------------------------------------------------|----------------------|------------------------|
| <b>Gender</b>           | ① M    ② F                                                                                                                                  | <b>Date of Birth</b> | ____year ____mm ____dd |
| <b>Height</b>           | cm                                                                                                                                          | <b>Weight</b>        | Kg                     |
| <b>Education</b>        | ① Below elementary school graduate    ② Middle school graduate<br>③ High school graduate    ④ University graduate    ⑤ above Masters degree |                      |                        |
| <b>Disease duration</b> | Duration of Knee osteoarthritis : ____year ____month                                                                                        |                      |                        |

### 2. KOOS-K

● **KOOS KNEE SURVEY**

**INSTRUCTIONS:** This survey asks for your view about your knee. This information will help us keep track of how you feel about your knee and how well you are able to perform your usual activities.

Answer every question by ticking the appropriate box, only one box for each question. If you are unsure about how to answer a question, please give the best answer you can.

**Symptoms**  
 These questions should be answered thinking of your knee symptoms during the last week.

- S1. Do you have swelling in your knee?  
 Never       Rarely       Sometimes       Often       Always
- S2. Do you feel grinding, hear clicking or any other type of noise when your knee moves?  
 Never       Rarely       Sometimes       Often       Always
- S3. Does your knee catch or hang up when moving?  
 Never       Rarely       Sometimes       Often       Always
- S4. Can you straighten your knee fully?  
 Never       Rarely       Sometimes       Often       Always
- S5. Can you bend your knee fully?  
 Never       Rarely       Sometimes       Often       Always

**Stiffness**

The following questions concern the amount of joint stiffness you have experienced during the last week in your knee. Stiffness is a sensation of restriction or slowness in the ease with which you move your knee joint.

S6. How severe is your knee joint stiffness after first wakening in the morning?

None       Mild       Moderate       Severe       Extreme

S7. How severe is your knee stiffness after sitting, lying or resting **later in the day**?

None       Mild       Moderate       Severe       Extreme

**Pain**

P1. How often do you experience knee pain?

Never       Monthly       Weekly       Daily       Always

**What amount of knee pain have you experienced the last week during the following activities?**

P2. Twisting/pivoting on your knee

None       Mild       Moderate       Severe       Extreme

P3. Straightening knee fully

None       Mild       Moderate       Severe       Extreme

P4. Bending knee fully

None       Mild       Moderate       Severe       Extreme

P5. Walking on flat surface

None       Mild       Moderate       Severe       Extreme

P6. Going up or down stairs

None       Mild       Moderate       Severe       Extreme

P7. At night while in bed

None       Mild       Moderate       Severe       Extreme

P8. Sitting or lying

None       Mild       Moderate       Severe       Extreme

P9. Standing upright

None       Mild       Moderate       Severe       Extreme

**Function, daily living**

The following questions concern your physical function. By this we mean your ability to move around and to look after yourself. For each of the following activities please indicate the degree of difficulty you have experienced in the last week due to your knee.

A1. Descending stairs

None       Mild       Moderate       Severe       Extreme

A2. Ascending stairs

None       Mild       Moderate       Severe       Extreme

**For each of the following activities please indicate the degree of difficulty you have experienced in the last week due to your knee.**

A3. Rising from sitting

A3-K. Rising from floor

None       Mild       Moderate       Severe       Extreme

A3-W. Rising from chair/sofa

None       Mild       Moderate       Severe       Extreme

A4. Standing

None       Mild       Moderate       Severe       Extreme

A5. Bending to floor/pick up an object

None       Mild       Moderate       Severe       Extreme

A6. Walking on flat surface

None       Mild       Moderate       Severe       Extreme

A7. Getting in/out of car

None       Mild       Moderate       Severe       Extreme

A8. Going shopping

None       Mild       Moderate       Severe       Extreme

A9. Putting on socks/stockings

None       Mild       Moderate       Severe       Extreme

A10. *Rising from bed*  
(In either occidental or oriental manner, tick the box that you are currently utilizing in your daily life. If the both method are applicable, please tick the both section)

A10-K. *Rising from floor bedding*

None       Mild       Moderate       Severe       Extreme

A10-W. *Rising from bed*

None       Mild       Moderate       Severe       Extreme

A11. *Taking off socks/stockings*

None       Mild       Moderate       Severe       Extreme

A12. *Lying in bed (turning over, maintaining knee position)*

None       Mild       Moderate       Severe       Extreme

A13. *Getting in/out of bath*

None       Mild       Moderate       Severe       Extreme

A14. *Sitting*  
(In either occidental or oriental manner, tick the box that you are currently utilizing in your daily life. If the both method are applicable, please tick the both section)

A14-K *Sitting on floor*

None       Mild       Moderate       Severe       Extreme

A14-W *Sitting on chair/sofa*

None       Mild       Moderate       Severe       Extreme

A15. *Getting on/off toilet*  
(In either occidental or oriental manner, tick the box that you are currently utilizing in your daily life. If the both method are applicable, please tick the both section)

A15-K *Getting on/off from Conventional toilet*

None       Mild       Moderate       Severe       Extreme

A15-W *Getting on/off from toilet bowl*

None       Mild       Moderate       Severe       Extreme

**For each of the following activities please indicate the degree of difficulty you have experienced in the last week due to your knee.**

A16. Heavy domestic duties (moving heavy boxes, scrubbing floors, etc)

None       Mild       Moderate       Severe       Extreme

A17. Light domestic duties (cooking, dusting, etc)

None       Mild       Moderate       Severe       Extreme

**Function, sports and recreational activities**

The following questions concern your physical function when being active on a higher level. The questions should be answered thinking of what degree of difficulty you have experienced during the **last week** due to your knee.

*SP1. Squatting*

None       Mild       Moderate       Severe       Extreme

*SP2. Running*

None       Mild       Moderate       Severe       Extreme

*SP3. Jumping*

None       Mild       Moderate       Severe       Extreme

*SP4. Twisting/pivoting on your injured knee*

None       Mild       Moderate       Severe       Extreme

*SP5. Kneeling*

None       Mild       Moderate       Severe       Extreme

**Quality of Life***Q1. How often are you aware of your knee problem?*

Never       Monthly       Weekly       Daily       Consistently

*Q2. Have you modified your life style to avoid potentially damaging activities to your knee?*

Not at all       Mildly       Moderately       Severely       Totally

*Q3. How much are you troubled with lack of confidence in your knee?*

Not at all       Mildly       Moderately       Severely       Extremely

*Q4. In general, how much difficulty do you have with your knee?*

None       Mild       Moderate       Severe       Extreme

**3. Health Questionnaire****EQ-5D**

By placing a tick in one box in each group below, please indicate which statements best describe your own health state today..

|                                                                                     |                          |
|-------------------------------------------------------------------------------------|--------------------------|
| <b>Mobility</b>                                                                     |                          |
| I have no problems in walking about.                                                | <input type="checkbox"/> |
| I have some problems in walking about.                                              | <input type="checkbox"/> |
| I am confined to bed.                                                               | <input type="checkbox"/> |
| <b>Self-Care</b>                                                                    |                          |
| I have no problems with self-care.                                                  | <input type="checkbox"/> |
| I have some problems washing or dressing myself.                                    | <input type="checkbox"/> |
| I am unable to wash or dress myself.                                                | <input type="checkbox"/> |
| <b>Usual Activities</b> (e.g. work, study, housework, family or leisure activities) |                          |
| I have no problems with performing my usual activities.                             | <input type="checkbox"/> |
| I have some problems with performing my usual activities.                           | <input type="checkbox"/> |
| I am unable to perform my usual activities.                                         | <input type="checkbox"/> |
| <b>Pain/Discomfort</b>                                                              |                          |
| I have no pain or discomfort.                                                       | <input type="checkbox"/> |
| I have moderate pain or discomfort.                                                 | <input type="checkbox"/> |
| I have extreme pain or discomfort.                                                  | <input type="checkbox"/> |
| <b>Anxiety/Depression</b>                                                           |                          |
| I am not anxious or depressed.                                                      | <input type="checkbox"/> |
| I am moderately anxious or depressed.                                               | <input type="checkbox"/> |
| I am extremely anxious or depressed.                                                | <input type="checkbox"/> |

### EQ-5D Visual Analogue Scale

To help people say how good or bad a health state is, we have drawn a scale (rather like a thermometer) on which the best state you can imagine is marked 100 and the worst state you can imagine is marked 0. We would like you to indicate on this scale how good or bad your own health is today, in your opinion. Please do this by drawing a line from the box below to whichever point on the scale indicates how good or bad your health state is today.

Your own  
health state  
today

100 : the best state you can imagine  
0 : the worst state you can imagine

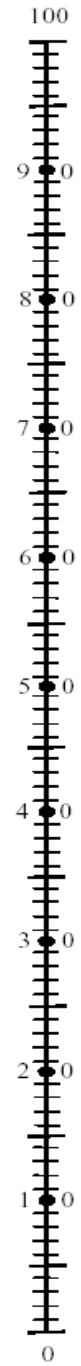

### 3. Pain NRS (Numeric rating scale)

## SECOND ASSESSMENT-PATIENT (AFTER TREATMENT 3WEEKS±3DAYS)

Visit Date: |d|d|/|m|m|/|y|y|y|y|

### 1. Treatment Adherence

The following questions are regarding how you took the prescribed knee osteoarthritis medication recently.

- 1) Have you taken the medication in accordance with Dr's treatment plan?  
(Not at all: 0%, Adhered every day: 100%)

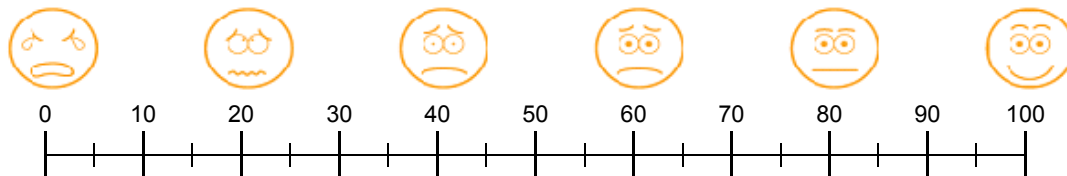

- 2) Would you answer that you adhered to Dr's treatment plan? Please choose the best answer below.

- ① Adhered strictly
- ② Considered adhered well
- ③ Moderately adhered
- ④ Did not adhere
- ⑤ Did not adhere at all (including no consumption of medication)

### 2. Patient's Awareness on treatment adherence of Knee osteoarthritis

If you did not answer ① above, what was the reason? (Answer can be multiple)

- ① Osteoarthritis medication is thought to be only a pain relief.
- ② I was advised to take medication when I only have pain: (Who was the advisor?\_\_\_\_\_)
- ③ My symptom has gone better.
- ④ Medication is not working properly.
- ⑤ I am worried about the adverse effects.
- ⑥ It causes indigestion, discomfort, heart burn and other GI events.
- ⑦ It makes my body swell.
- ⑧ I gained some weights.
- ⑨ I have too many pills to take.
- ⑩ The medicine is expensive.
- ⑪ The treatment plan is complicated.
- ⑫ Lost medicine
- ⑬ etc:



Please refer to the pictures below and answer your pain level.  
 0 states pain free and 10 states maximum pain, how would you score your pain level over the last week? [      ]

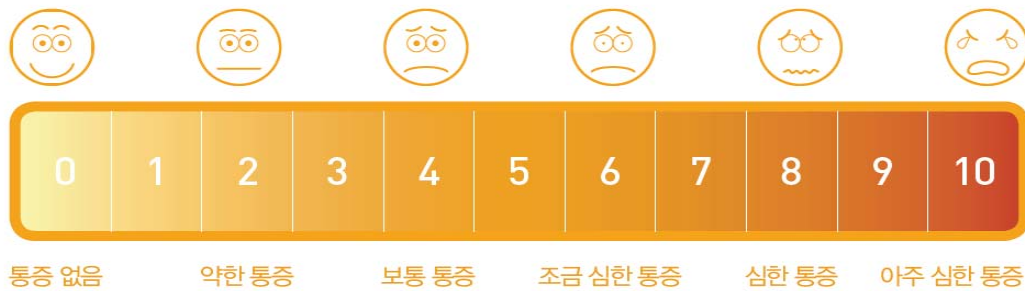

**2. KOOS-K**

**● KOOS KNEE SURVEY**

**INSTRUCTIONS:** This survey asks for your view about your knee. This information will help us keep track of how you feel about your knee and how well you are able to perform your usual activities.

Answer every question by ticking the appropriate box, only one box for each question. If you are unsure about how to answer a question, please give the best answer you can.

**Symptoms**  
 These questions should be answered thinking of your knee symptoms during the last week.

- S1. Do you have swelling in your knee?  
 Never       Rarely       Sometimes       Often       Always
- S2. Do you feel grinding, hear clicking or any other type of noise when your knee moves?  
 Never       Rarely       Sometimes       Often       Always
- S3. Does your knee catch or hang up when moving?  
 Never       Rarely       Sometimes       Often       Always
- S4. Can you straighten your knee fully?  
 Never       Rarely       Sometimes       Often       Always
- S5. Can you bend your knee fully?  
 Never       Rarely       Sometimes       Often       Always

**Stiffness**

The following questions concern the amount of joint stiffness you have experienced during the last week in your knee. Stiffness is a sensation of restriction or slowness in the ease with which you move your knee joint.

S6. How severe is your knee joint stiffness after first wakening in the morning?

None       Mild       Moderate       Severe       Extreme

S7. How severe is your knee stiffness after sitting, lying or resting **later in the day**?

None       Mild       Moderate       Severe       Extreme

**Pain**

P1. How often do you experience knee pain?

Never       Monthly       Weekly       Daily       Always

**What amount of knee pain have you experienced the last week during the following activities?**

P2. Twisting/pivoting on your knee

None       Mild       Moderate       Severe       Extreme

P3. Straightening knee fully

None       Mild       Moderate       Severe       Extreme

P4. Bending knee fully

None       Mild       Moderate       Severe       Extreme

P5. Walking on flat surface

None       Mild       Moderate       Severe       Extreme

P6. Going up or down stairs

None       Mild       Moderate       Severe       Extreme

P7. At night while in bed

None       Mild       Moderate       Severe       Extreme

P8. Sitting or lying

None       Mild       Moderate       Severe       Extreme

P9. Standing upright

None       Mild       Moderate       Severe       Extreme

**Function, daily living**

The following questions concern your physical function. By this we mean your ability to move around and to look after yourself. For each of the following activities please indicate the degree of difficulty you have experienced in the last week due to your knee.

A1. Descending stairs

None       Mild       Moderate       Severe       Extreme

A2. Ascending stairs

None       Mild       Moderate       Severe       Extreme

**For each of the following activities please indicate the degree of difficulty you have experienced in the last week due to your knee.**

A3. *Rising from sitting*

A3-K. *Rising from floor*

None       Mild       Moderate       Severe       Extreme

A3-W. *Rising from chair/sofa*

None       Mild       Moderate       Severe       Extreme

A4. *Standing*

None       Mild       Moderate       Severe       Extreme

A5. *Bending to floor/pick up an object*

None       Mild       Moderate       Severe       Extreme

A6. *Walking on flat surface*

None       Mild       Moderate       Severe       Extreme

A7. *Getting in/out of car*

None       Mild       Moderate       Severe       Extreme

A8. *Going shopping*

None       Mild       Moderate       Severe       Extreme

A9. *Putting on socks/stockings*

None       Mild       Moderate       Severe       Extreme

A10. *Rising from bed*  
(In either occidental or oriental manner, tick the box that you are currently utilizing in your daily life. If the both method are applicable, please tick the both section)

A10-K. *Rising from floor bedding*

None       Mild       Moderate       Severe       Extreme

A10-W. *Rising from bed*

None       Mild       Moderate       Severe       Extreme

A11. *Taking off socks/stockings*

None       Mild       Moderate       Severe       Extreme

A12. *Lying in bed (turning over, maintaining knee position)*

None       Mild       Moderate       Severe       Extreme

A13. *Getting in/out of bath*

None       Mild       Moderate       Severe       Extreme

A14. *Sitting*  
(In either occidental or oriental manner, tick the box that you are currently utilizing in your daily life. If the both method are applicable, please tick the both section)

A14-K *Sitting on floor*

None       Mild       Moderate       Severe       Extreme

A14-W *Sitting on chair/sofa*

None       Mild       Moderate       Severe       Extreme

A15. *Getting on/off toilet*  
(In either occidental or oriental manner, tick the box that you are currently utilizing in your daily life. If the both method are applicable, please tick the both section)

A15-K *Getting on/off from Conventional toilet*

None       Mild       Moderate       Severe       Extreme

A15-W *Getting on/off from toilet bowl*

None       Mild       Moderate       Severe       Extreme

**For each of the following activities please indicate the degree of difficulty you have experienced in the last week due to your knee.**

A16. Heavy domestic duties (moving heavy boxes, scrubbing floors, etc)

None       Mild       Moderate       Severe       Extreme

A17. Light domestic duties (cooking, dusting, etc)

None       Mild       Moderate       Severe       Extreme

**Function, sports and recreational activities**

The following questions concern your physical function when being active on a higher level. The questions should be answered thinking of what degree of difficulty you have experienced during the **last week** due to your knee.

*SP1. Squatting*

None       Mild       Moderate       Severe       Extreme

*SP2. Running*

None       Mild       Moderate       Severe       Extreme

*SP3. Jumping*

None       Mild       Moderate       Severe       Extreme

*SP4. Twisting/pivoting on your injured knee*

None       Mild       Moderate       Severe       Extreme

*SP5. Kneeling*

None       Mild       Moderate       Severe       Extreme

**Quality of Life***Q1. How often are you aware of your knee problem?*

Never       Monthly       Weekly       Daily       Consistently

*Q2. Have you modified your life style to avoid potentially damaging activities to your knee?*

Not at all       Mildly       Moderately       Severely       Totally

*Q3. How much are you troubled with lack of confidence in your knee?*

Not at all       Mildly       Moderately       Severely       Extremely

*Q4. In general, how much difficulty do you have with your knee?*

None       Mild       Moderate       Severe       Extreme

**3. Health Questionnaire****EQ-5D**

By placing a tick in one box in each group below, please indicate which statements best describe your own health state today..

|                                                                                     |                          |
|-------------------------------------------------------------------------------------|--------------------------|
| <b>Mobility</b>                                                                     |                          |
| I have no problems in walking about.                                                | <input type="checkbox"/> |
| I have some problems in walking about.                                              | <input type="checkbox"/> |
| I am confined to bed.                                                               | <input type="checkbox"/> |
| <b>Self-Care</b>                                                                    |                          |
| I have no problems with self-care.                                                  | <input type="checkbox"/> |
| I have some problems washing or dressing myself.                                    | <input type="checkbox"/> |
| I am unable to wash or dress myself.                                                | <input type="checkbox"/> |
| <b>Usual Activities</b> (e.g. work, study, housework, family or leisure activities) |                          |
| I have no problems with performing my usual activities.                             | <input type="checkbox"/> |
| I have some problems with performing my usual activities.                           | <input type="checkbox"/> |
| I am unable to perform my usual activities.                                         | <input type="checkbox"/> |
| <b>Pain/Discomfort</b>                                                              |                          |
| I have no pain or discomfort.                                                       | <input type="checkbox"/> |
| I have moderate pain or discomfort.                                                 | <input type="checkbox"/> |
| I have extreme pain or discomfort.                                                  | <input type="checkbox"/> |
| <b>Anxiety/Depression</b>                                                           |                          |
| I am not anxious or depressed.                                                      | <input type="checkbox"/> |
| I am moderately anxious or depressed.                                               | <input type="checkbox"/> |
| I am extremely anxious or depressed.                                                | <input type="checkbox"/> |

### EQ-5D Visual Analogue Scale

To help people say how good or bad a health state is, we have drawn a scale (rather like a thermometer) on which the best state you can imagine is marked 100 and the worst state you can imagine is marked 0. We would like you to indicate on this scale how good or bad your own health is today, in your opinion. Please do this by drawing a line from the box below to whichever point on the scale indicates how good or bad your health state is today.

Your own  
health state  
today

100 : the best state you can imagine  
0 : the worst state you can imagine

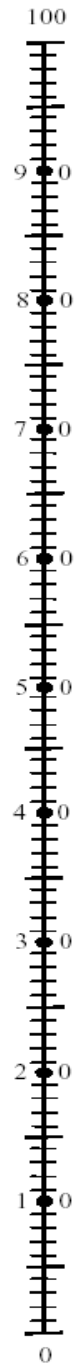

Supplement: jkms-31-795-s002.pdf [file jkms-31-795-s002.pdf]
