# Supplementary material for: The Effects of Adherence to Non-Steroidal Anti-Inflammatory Drugs and Factors Influencing Drug Adherence in Patients with Knee Osteoarthritis
Source: PubMed Central journal article supplement — J Korean Med Sci. 2016 Mar 29;31(5):795–800. doi: 10.3346/jkms.2016.31.5.795 (PMC4835608; doi:10.3346/jkms.2016.31.5.795), 2016-03-29
Supplement: jkms-31-795-s001.pdf [file jkms-31-795-s001.pdf]

&lt; Appendix 1 &gt;

## FIRST ASSESSMENT - DOCTOR

Visit Date: | d | d | / | m | m | / | y | y | y | y |

**Patient who meets all the criteria below can only be enrolled.**

**1. Patients included in Knee OA as ACR standard**

- **ACR criteria: Patient who meets following three criteria of idiopathic Knee osteoarthritis categorized by clinical and radiological standard.**

- ① Knee joint pain
- ② Exist one of following three symptoms:
  - Age > 50 y
  - Morning stiffness < 30 minutes
  - Friction sound
- ③ Evidence of osteophyte in the X-ray

**2. Age over 65 years old**

**3. Pain NRS≥4 (If pain exist in both side of knee joints, mark the worse side as pain index.**

(0: Free from pain, 10: the worst pain ever)

|                          |                          |                          |                          |                          |                          |                          |                          |                          |                          |                          |
|--------------------------|--------------------------|--------------------------|--------------------------|--------------------------|--------------------------|--------------------------|--------------------------|--------------------------|--------------------------|--------------------------|
| 0                        | 1                        | 2                        | 3                        | 4                        | 5                        | 6                        | 7                        | 8                        | 9                        | 10                       |
| <input type="checkbox"/> |

**4. Patient diagnosed as symptomatic knee OA by a clinician**

**5. Recommended NSAIDs (including COX-2 inhibitors) for 3 weeks from a clinician.**

- **What is the reason for prescribing NSAIDs (including COX-2 inhibitors)? (Answer can be multiple)**
  - ① Due to severe pain
  - ② NSAIDs have a relatively better effectiveness compared to other medicine.
  - ③ Low effectiveness when used for 1~2 weeks
  - ④ Signs of Inflammation present.
  - ⑤ etc:
  - ⑥ Unable to answer
- **What is the usage for prescribed NSAIDs(including COX-2 inhibitors)?**

1 day (        ) times

**Respondent's signature:** \_\_\_\_\_ **Date:**        year        mm
